# Supplementary material for: 10 Jahre Screening auf Frühgeborenenretinopathie (2009–2019)
Source: Springer Nature journal article supplement (doi:10.1007/s00347-023-01847-z), 2023-04-21
Supplement: MOESM1 [file 25268060]

| Tab.S1: Demografie und ROP Charakteristika extern gescreenter Frühgeborener           |                           |                     |
|---------------------------------------------------------------------------------------|---------------------------|---------------------|
|                                                                                       |                           | Gesamtzahl (Kinder) |
| <b>Verteilung im Screening-Zeitraum<sup>a</sup></b>                                   | 2009                      | 2                   |
|                                                                                       | 2010                      | 6                   |
|                                                                                       | 2011                      | 0                   |
|                                                                                       | 2012                      | 1                   |
|                                                                                       | 2013                      | 5                   |
|                                                                                       | 2014                      | 0                   |
|                                                                                       | 2015                      | 3                   |
|                                                                                       | 2016                      | 5                   |
|                                                                                       | 2017                      | 4                   |
|                                                                                       | 2018                      | 3                   |
| <b>Demografie bei Geburt</b><br>(n=29)                                                | GA [MW in SSW] (SD)       | 25,9 (2,2)          |
|                                                                                       | GG [MW in g] (SD)         | 719,6 (226,1)       |
|                                                                                       | Weiblich [n, Kinder] (%)  | 12 (41,4)           |
|                                                                                       | Mehrlinge [n, Kinder] (%) | 11 (38,9)           |
| <b>ROP-Charakteristika bei Aufnahme in Gießen</b><br>[Anzahl der Augen] (%)<br>(n=58) | II, 2(+)                  | 2 (3,4)             |
|                                                                                       | I, 3-                     | 3 (5,2)             |
|                                                                                       | II, 3-                    | 4 (6,9)             |
|                                                                                       | II, 3(+)                  | 2 (3,4)             |
|                                                                                       | I, 3+                     | 2 (3,4)             |
|                                                                                       | II, 3+                    | 22 (37,9)           |
|                                                                                       | III, 3+                   | 2 (3,4)             |
|                                                                                       | I, 4a-                    | 10 (17,2)           |
|                                                                                       | II, 4a-                   | 1 (1,7)             |
|                                                                                       | I, 4a(+)                  | 2 (3,4)             |
|                                                                                       | I, 4b-                    | 2 (3,4)             |

|                                                                                                                                                                                                          |        |         |
|----------------------------------------------------------------------------------------------------------------------------------------------------------------------------------------------------------|--------|---------|
|                                                                                                                                                                                                          | I, 5-  | 4 (6,9) |
|                                                                                                                                                                                                          | AP-ROP | 2 (3,4) |
| <b>GA</b> Gestationsalter, <b>GG</b> Geburtsgewicht, <b>MW</b> Mittelwert, <b>SA</b> Standardabweichung <b>SWW</b> Schwangerschaftswoche<br><sup>a</sup> 1 Untersuchungsjahr = 12 Monate = 01.04 - 31.03 |        |         |

**Abb. S1a**

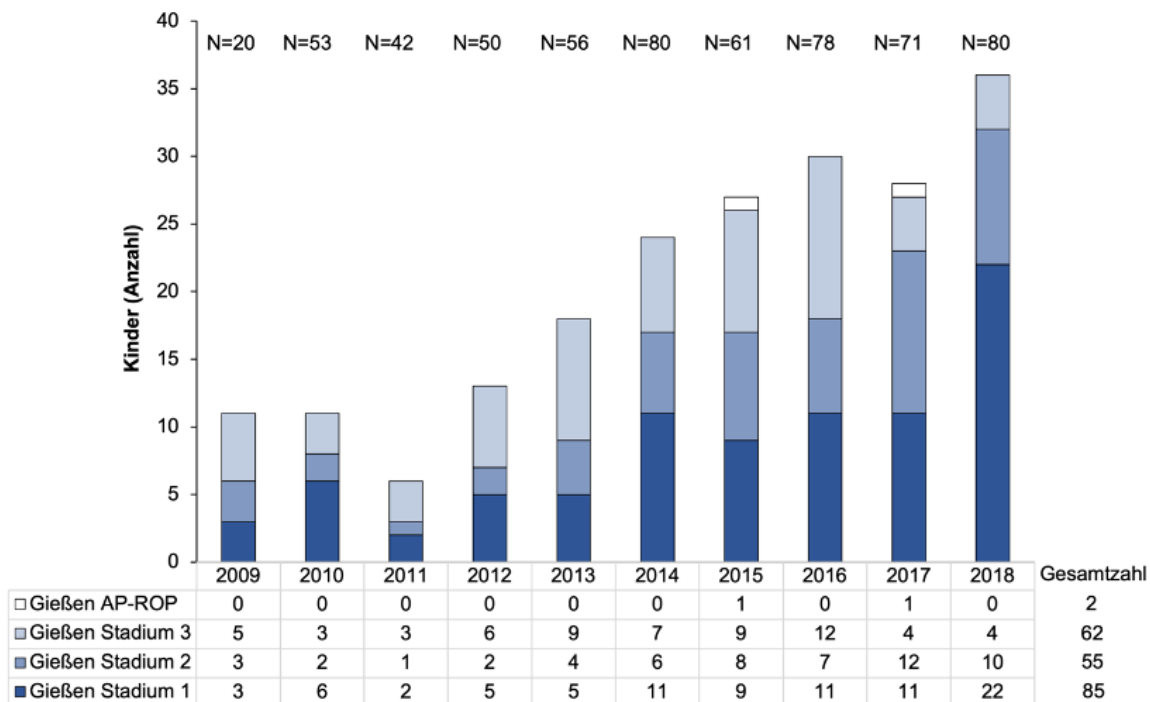

**Abb. S1b**

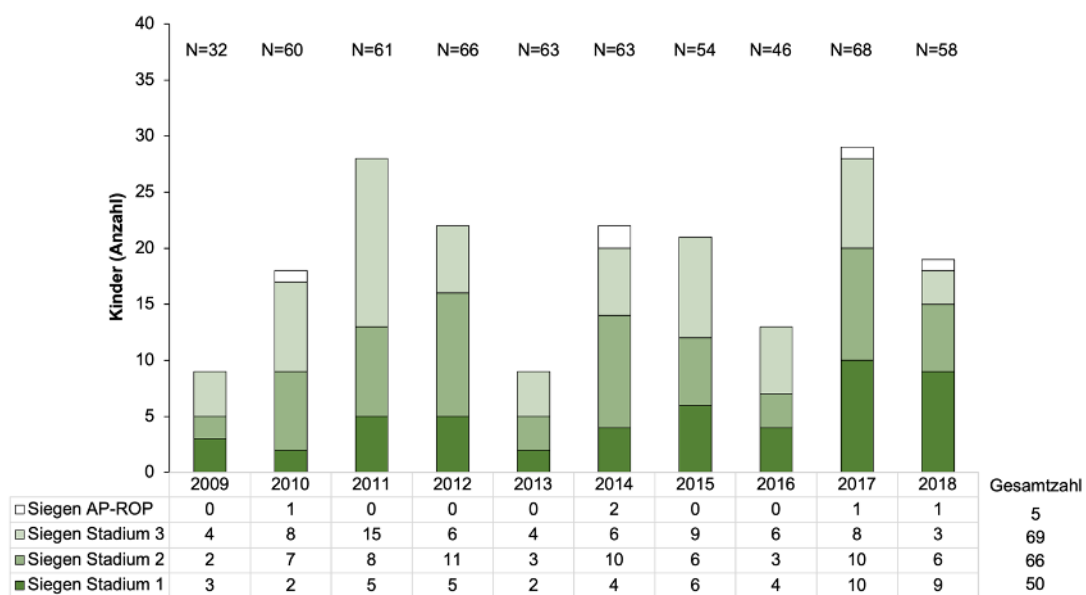

**Abb. S1c**

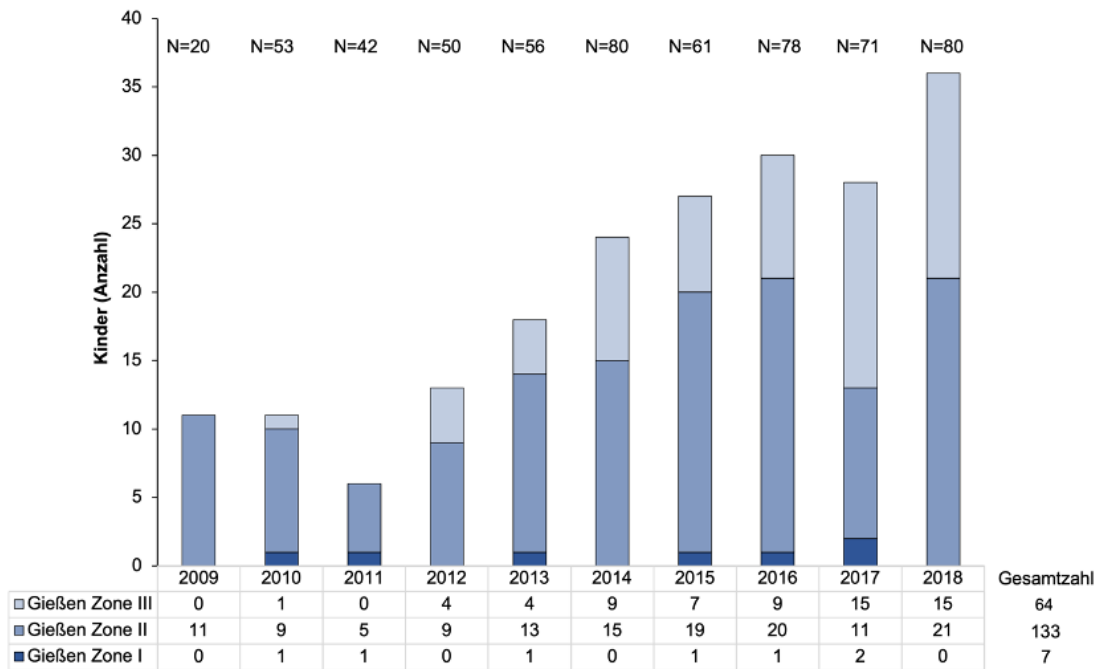

**Abb. S1d**

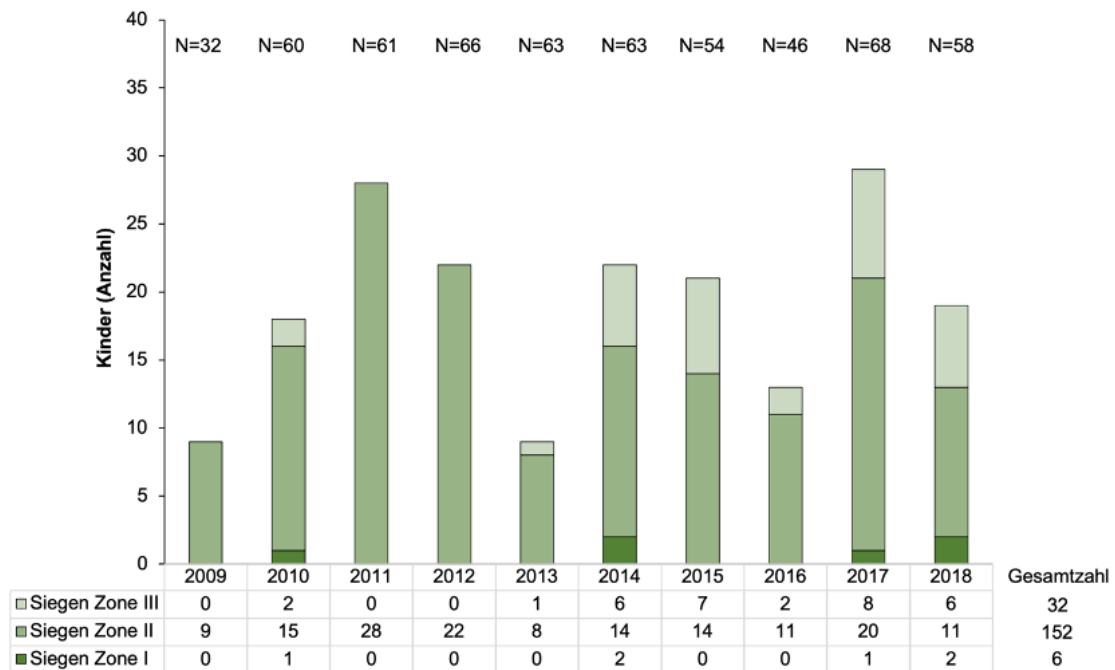

**Abb.S1 ROP-Fälle, eingeteilt nach ROP-Stadium und -Zone am stärker betroffenen Auge zum Zeitpunkt der maximalen Ausprägung, in Gießen (a,c) und Siegen (b,d) pro Jahr, 2009-2019. Ohne externe Kinder.**  
 1 Untersuchungsjahr = 12 Monate = 01.04 - 31.03
